# Supplementary material for: Rapid and Efficient Isolation of Exosomes by Clustering and Scattering
Source: PubMed Central journal article supplement (PMC7141250; doi:10.3390/jcm9030650), 2020-02-28
Supplement: jcm-09-00650-s001.pdf [file jcm-09-00650-s001.pdf]

Supporting information for

# Rapid and Efficient Isolation of Exosomes by Clustering and Scattering

**Jinhyun Kim<sup>1‡</sup>, Hoyoon Lee<sup>1‡</sup>, KyongHwa Park<sup>2,3</sup>, and Sehyun Shin<sup>1,3,\*</sup>**

<sup>1</sup> School of Mechanical engineering, Korea University, Seoul, Korea; mimoz742@korea.ac.kr (J.K.); leehoyoon@korea.ac.kr (H.L.)

<sup>2</sup> Department of Internal Medicine, Anam Hospital, Korea University, Seoul, 02841, Korea; khpark@korea.ac.kr (K.H.P.)

<sup>3</sup> Engineering Research Center for Biofluid Biopsy, Seoul, 02841, Korea; lexerdshin@korea.ac.kr (S.S.)

‡ Jinhyun Kim and Hoyoon Lee contributed equally to the article as first authors

\* Correspondence: lexerdshin@korea.ac.kr; Tel.: +82-10-4506-2825

| Incubation Time | 10 min                                                                            | 30 min                                                                            | 60 min                                                                            | 90 min                                                                             |
|-----------------|-----------------------------------------------------------------------------------|-----------------------------------------------------------------------------------|-----------------------------------------------------------------------------------|------------------------------------------------------------------------------------|
| 24°C            |  |  |  |  |
| 4°C             |  |  |  |  |

**Fig. S1** EV cluster formation according to incubation time and temperature; The input PLL concentration was fixed at 0.5 mg/mL.

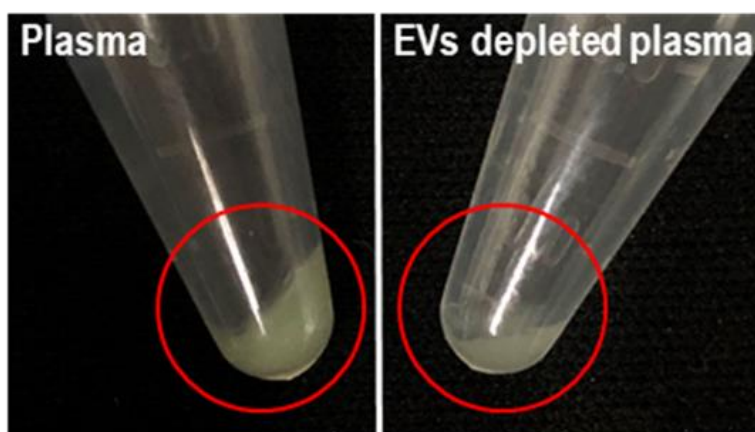

**Fig. S2** Comparison of normal plasma and EV depleted plasma via pellet volume

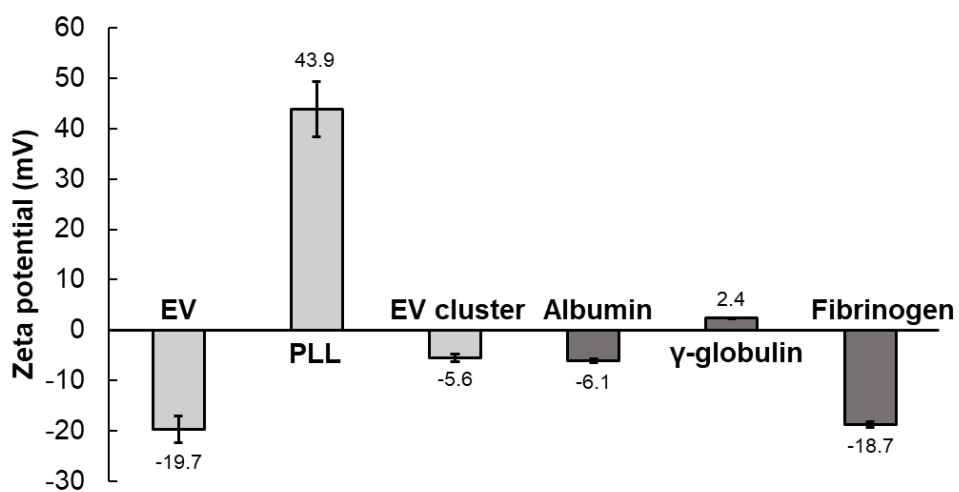

**Fig. S3** Comparison of zeta potential results of representative plasma proteins: fibrinogen, globulin, and albumin
